Aboriginal births: smoking, alcohol misuse, drug misuse, and assault

## **A large proportion of poor birth outcomes among Aboriginal Western**

## **Australians are attributable to smoking, alcohol and substance misuse, and assault**

Alison J. Gibberd<sup>1,5</sup>, Judy M. Simpson<sup>1</sup>, Jocelyn Jones<sup>2</sup>, Robyn Williams<sup>3</sup>, Fiona Stanley<sup>4</sup>, Sandra J. Eades<sup>3,5</sup>

<sup>1</sup>The University of Sydney, Faculty of Medicine and Health, Sydney School of Public Health, Sydney, New South Wales, Australia

<sup>2</sup>The University of Western Australia, Faculty of Health and Medical Sciences, Perth, Western Australia, Australia

<sup>3</sup>Baker Heart and Diabetes Institute, Aboriginal Health Domain, Melbourne, Victoria, Australia

<sup>4</sup>Telethon Kids Institute, The University of Western Australia, Perth, Western Australia, Australia

<sup>5</sup>The University of Melbourne, Melbourne School of Population and Global Health, Melbourne, Victoria, Australia

### **Corresponding author:**

Alison Gibberd

Level 3, 207 Bouverie St

The University of Melbourne Victoria 3010

Ph: (61) 3 8344 9065

Email: [alison.gibberd@unimelb.edu.au](mailto:alison.gibberd@unimelb.edu.au)

### **Co-authors:**

Judy Simpson: [judy.simpson@sydney.edu.au](mailto:judy.simpson@sydney.edu.au)

Jocelyn Jones: [J.Jones@uwa.edu.au](mailto:J.Jones@uwa.edu.au)

Robyn Williams: [robyn.williams@curtin.edu.au](mailto:robyn.williams@curtin.edu.au)

Fiona Stanley: [Fiona.Stanley@telethonkids.org.au](mailto:Fiona.Stanley@telethonkids.org.au)

Sandra Eades: [Sandra.Eades@baker.edu.au](mailto:Sandra.Eades@baker.edu.au)

Aboriginal births: smoking, alcohol misuse, drug misuse, and assault

## Abstract

### Background

Aboriginal infants have poorer birth outcomes than non-Aboriginal infants. Harmful use of tobacco, alcohol, and other substances is higher among Aboriginal women, as is violence, due to factors such as intergenerational trauma and poverty. We estimated the proportion of small for gestational age (SGA) births, preterm births, and perinatal deaths that could be attributed to these risks.

### Methods

Birth, hospital, mental health, and death records for Aboriginal singleton infants born in Western Australia from 1998-2010 and their parents were linked. Using logistic regression with a generalized estimating equation approach, associations with birth outcomes and population attributable fractions were estimated after adjusting for demographic factors and maternal health during pregnancy.

### Results

Of 28,119 births, 16% of infants were SGA, 13% were preterm, and 2% died perinatally. 51% of infants were exposed *in utero* to at least one of the risk factors and the fractions attributable to them were 37% (SGA), 16% (preterm) and 20% (perinatal death).

### Conclusions

A large proportion of adverse outcomes were attributable to the modifiable risk factors of substance use and assault. Significant improvements in Aboriginal perinatal health are likely to follow reductions in these risk factors. These results highlight the importance of identifying and implementing risk reduction measures which are effective in, and supported by, Aboriginal women, families, and communities.

**Keywords:** birthweight; preterm birth; perinatal mortality; Aboriginal and Torres Strait Islander Australians; indigenous; linked routinely-collected data

Aboriginal births: smoking, alcohol misuse, drug misuse, and assault

## Manuscript

### 1 Background

2 Australian Aboriginal and Torres Strait Islander (hereafter respectfully referred to as Aboriginal)  
3 infants tend to have poorer birth outcomes than non-Aboriginal infants. In the state of Western  
4 Australia (WA), preterm birth, stillbirth, and neonatal death rates are 2-3 times higher and the  
5 average birthweight is 200g less for infants with Aboriginal mothers than non-Aboriginal mothers  
6 [1,2]. In the past three decades, though the neonatal death rate has declined, the rates of small for  
7 gestational age (SGA) births, preterm births and stillbirths to Aboriginal mothers in WA have  
8 remained static [1-3] and a better understanding of why these outcomes are so common among  
9 Aboriginal infants is needed.

10

11 Smoking during pregnancy, harmful use of alcohol and drugs, and assault against the mother are all  
12 associated with poor birth outcomes [4,5] and are also more common among Aboriginal than non-  
13 Aboriginal women. The context in which they arise is generations of displacement from traditional  
14 lands, limited education and employment opportunities resulting in economic disadvantage,  
15 marginalisation, racism, forced removal of children from their parents, and other associated losses.

16

17 Aboriginal women smoke during approximately half of all pregnancies [6]. While abstinence from  
18 alcohol is common in Aboriginal communities, among those who do drink, consumption is more  
19 likely to be harmful and Aboriginal women are seven times more likely to die from alcoholic liver  
20 cirrhosis and alcohol dependence than non-Aboriginal women [7]. Rates of drug use are also high. In  
21 2015, 27% of Aboriginal women reported using substances in the previous 12 months for non-  
22 medical reasons [8]. By contrast, 13% of non-Aboriginal women reported illicit drug use [9]. Finally,  
23 Aboriginal women are 35 times more likely to be hospitalised because of an assault than non-  
24 Aboriginal women [10]. The use of tobacco, alcohol and drugs, and assault are inter-related and  
25 multiple risk factors can aggregate in pregnancy [11].

Aboriginal births: smoking, alcohol misuse, drug misuse, and assault

26

27 The associations of poor birth outcomes with smoking, alcohol, drugs, and assault have been  
28 observed across a range of populations [4,5]. However, their contribution to the high levels of poor  
29 birth outcomes among Aboriginal infants is rarely quantified, particularly for assault. We therefore  
30 aimed to estimate the proportions of Aboriginal SGA births, preterm births, and perinatal deaths in  
31 WA from 1998 to 2010 that can be attributed to smoking, misuse of alcohol or drugs, and assault.

32

### 33 **Methods**

#### 34 *Study cohort and data sources*

35 The study cohort comprised all singleton births in WA from 1998 to 2010, where the infant and their  
36 full siblings were categorised as Aboriginal using the algorithm MSM+Family, described in Gibberd *et*  
37 *al* [12]. Briefly, this algorithm assigns Aboriginal status to each infant using the Indigenous identifiers  
38 on their birth record (Midwives Notification System [MNS]), birth registration, inpatient hospital  
39 records (Hospital Morbidity Data Collection), and WA Register of Developmental Anomalies  
40 (WARDA) record, as well as their family members' records. The algorithm offers some protection  
41 against false positives that can occur with linkage of many records, while relatives' information  
42 resolves some false negatives and positives and reduces the number of infants with unknown  
43 Aboriginal status [12]. The study cohort's relatives were identified by WA's records of family links,  
44 the Family Connections System [13].

45

46 The Data Linkage Branch in the Department of Health linked the above datasets and death records  
47 using probabilistic linkage.

48

49 In total, 28,119 Aboriginal infants were recorded in the MNS from 1998 to 2010. Each birth with a  
50 gestational age of at least 20 weeks and/or a birthweight of 400 grams is notified to the WA

Aboriginal births: smoking, alcohol misuse, drug misuse, and assault

51 Department of Health by an attending midwife or medical officer. Details of the mother and infant,  
52 the birth, and conditions affecting the mother or pregnancy are recorded on the birth record.

53

#### 54 *Outcomes*

55 The three outcomes of interest were SGA, preterm birth, and perinatal death. An infant was defined  
56 as SGA if their birthweight was less than the first decile for Australian singleton infants of the same  
57 sex and gestational age, born alive from 1998 to 2007 [14]. Preterm birth was defined as any live  
58 birth or stillbirth at 20 to 36 completed weeks' gestation. In line with the Australian policy of  
59 classification of perinatal deaths, they were defined as either stillbirth (the death of a baby prior to  
60 the complete expulsion or extraction from its mother at a gestational age of 20 or more completed  
61 weeks or with a birthweight of at least 400 grams) or death less than 28 days after a live birth [15].

62

63 Gestational age (GA) as determined by Blair *et al's* method [16] was missing for 67 of the 28,119  
64 infants. All 67 infants had an estimated gestational age of 20 to 34 weeks in their birth records,  
65 which was based on observations of the neonate, including sole creases and scalp hair. We classified  
66 all 67 infants as preterm because, even if this estimate was less accurate than Blair *et al's* method,  
67 the magnitude of the error would need to be at least 3 weeks for an infant to be misclassified as  
68 preterm. However, as classification as SGA was based on actual GA, infants with missing GA were  
69 excluded from analyses involving SGA.

70

#### 71 *Study factors*

72 The four risk factors of interest were maternal smoking, alcohol misuse, drug misuse, and assault  
73 during pregnancy. Maternal smoking has been recorded comprehensively on WA birth records since  
74 1998. Mothers were categorised as misusing alcohol or drugs if an alcohol- or drug-related diagnosis  
75 was recorded in (1) the child's birth record or (2) in any diagnosis field on their hospital admissions  
76 during the pregnancy or (3) a mental health record during the pregnancy.

Aboriginal births: smoking, alcohol misuse, drug misuse, and assault

77

78 The mother was categorised as the victim of assault if violence against her was recorded in a hospital  
79 admission in the period from two years prior to the start of the pregnancy until the birth. We  
80 included this 'look-back' period because around half of all women who suffer physical violence  
81 before pregnancy continue to be exposed during pregnancy and socio-economically deprived  
82 women are particularly likely to have violence continue into pregnancy [17], violence prior to  
83 pregnancy is an independent predictor of poor birth outcomes [18], and a look-back period was  
84 likely to improve ascertainment of cases of assault as we could only identify violence through  
85 external injury codes in one dataset. We did not include a look-back period for alcohol or drug  
86 misuse as we had additional data sources to identify misuse and the vast majority of women cease  
87 or reduce their consumption during pregnancy [19, 20]. These issues did not arise for smoking, a  
88 mandatory field in the birth record.

89

#### 90 *Other explanatory variables*

91 We initially chose explanatory variables that are known, or suspected, to be associated with the  
92 birth outcomes, were recorded in our data, and were not rare. They were *demographic information*  
93 (infant year of birth, infant sex, maternal parity, and maternal age), *maternal infections during*  
94 *pregnancy* (urinary tract infections [UTI], *Herpes simplex*, gonorrhoea, chlamydia, vaginitis [vaginitis,  
95 *Candida*, and/or trichomoniasis], Group B streptococcus, and other infections [syphilis,  
96 toxoplasmosis, rubella, cytomegalovirus, and/or varicella zoster]), and *maternal long-term health*  
97 (maternal height, diabetes, hypertension, obesity, mental health conditions, heart disease, and  
98 asthma).

99

100 We identified maternal health conditions from both the infant's birth record and the mother's  
101 hospital records during pregnancy as the combination improves ascertainment with little change in  
102 the number of false positives [21]. Using broad categories for diseases during pregnancy also

Aboriginal births: smoking, alcohol misuse, drug misuse, and assault

103 increases sensitivity, with minimal change in specificity [21]. “Diabetes” included pre-existing and  
104 gestational diabetes, and “hypertension” included pre-existing hypertension complicating  
105 pregnancy, pre-eclampsia, and eclampsia. All relevant codes of the International Classification of  
106 Diseases, 9<sup>th</sup> and 10<sup>th</sup> Revisions (ICD-9-CM, ICD-10-AM) are listed in Additional file 1.

107

### 108 *Analysis*

109 In the adjusted logistic regression model for each outcome, we initially included the study factors  
110 (maternal smoking, alcohol misuse, drug misuse, assault) and all other explanatory variables with  $P <$   
111 0.2 in unadjusted models. Variables were sequentially removed until only variables with  $P < 0.05$  and  
112 the study factors remained. We then entered interactions with the study factors, except interactions  
113 with maternal height which we did not believe were biologically plausible. With no prior reason to  
114 believe there would be interactions, we set the significance level at 0.01. We then entered all  
115 significant interactions into the model simultaneously and retained those that remained significant.  
116 We then checked the variable selection by adding the excluded variables to the model again, one-by-  
117 one. However, they remained non-significant and their inclusion did not meaningfully change the  
118 coefficients for the four study factors.

119

120 We used the multivariable fractional polynomial procedure to test whether non-linear functional  
121 forms for the continuous variables were preferable [22]. In the fully adjusted models, maternal  
122 height had linear associations with all three outcomes and infant’s year of birth had linear or no  
123 association. Transformations of maternal age of degree 1 and degree 3 were selected for the  
124 preterm birth model and degree  $-\frac{1}{2}$  and degree 3 for the perinatal death model.

125

126 Maternal height, an important predictor of birth outcomes [23], was missing for 9305/28119 (33%)  
127 of births. However, for 6078/9305 cases, maternal height was available in siblings’ birth records. We

Aboriginal births: smoking, alcohol misuse, drug misuse, and assault

128 used multiple imputation to impute the remaining 3227 (11%) missing cases [Additional file 1] [24].

129 We created 20 complete datasets.

130

131 Regression coefficients and variances were obtained from models fit to each of the 20 datasets using

132 logistic regression with a generalised estimating equation (GEE) approach to account for correlation

133 within mothers. Independent working correlation matrices and robust standard errors were

134 selected. Using Rubin's rules, we combined the 20 sets of regression coefficients and variances [25].

135

136 Parents may have children with more than one partner and those partners may also have children

137 with more than one partner. As a result, children are not all clustered in nuclear families and can be

138 cross-classified to mothers and fathers. We calculated regression coefficient covariance matrices

139 that took cross-classification into account [Additional file 1]. Because these matrices were very

140 similar to those obtained by clustering on the mother, we present the results from clustering by

141 mother only.

142

143 Population attributable fractions (PAFs) are the proportions of disease attributable to an exposure or

144 group of exposures. We calculated model-based adjusted PAFs for the risk factors of interest by

145 calculating the difference between the observed number of poor outcomes and the expected

146 number if the risk factor was eliminated from the population, divided by the observed number of

147 outcomes [26]. We estimated 95% confidence intervals using bootstrap with 1,000 replicates.

148

149 SAS software, Version 9.4, was used for all analyses, with some exceptions. R 3.4.0 [27] was used for

150 the multiple imputation, to identify appropriate fractional polynomials, to obtain bootstrap samples,

151 and to calculate population attributable fractions (using regression coefficients obtained using SAS).

152

153 *Sensitivity and subgroup analyses*



Aboriginal births: smoking, alcohol misuse, drug misuse, and assault

154 We conducted sensitivity analyses by analysing the subset of 18,814 out of 28,119 births which had  
155 maternal height recorded on their birth records ('complete cases'). As we did not include  
156 remoteness or socioeconomic disadvantage to avoid overfitting, sensitivity analyses were also  
157 conducted with these variables included. Finally, as research often focuses on first-born infants and  
158 birth weight varies by parity, we also stratified by parity.

159

## 160 **Results**

161 Approximately a quarter (27%) of the 28,119 infants had at least one of the three outcomes of  
162 interest: 16% of infants were SGA; 13% of infants were preterm; and 2% died perinatally (Table 1).  
163 Mothers smoked during 47% of the pregnancies and alcohol misuse was recorded for 3% of  
164 pregnancies, drug misuse for 6%, and assault for 7%. For 51% of births, at least one of these risks  
165 was present.

<< Table 1 goes around here >>

166 Maternal smoking was associated with over twice the odds of SGA birth, 26% higher odds of preterm  
167 birth and 49% higher odds of perinatal death (Figure 1). Alcohol was associated with 118% higher  
168 odds of SGA and 83% high odds of perinatal death, but the association with preterm birth, while  
169 positive, was not statistically significant. Drug misuse and assault were strongly associated with SGA  
170 and preterm birth, but not perinatal death.

171

172 << Figure 1 goes around here >>

173

174 There were two interactions with the risk factors of interest. Compared to mothers who neither  
175 smoked nor misused drugs, those who either smoked or misused drugs had over twice the odds of a  
176 SGA infant (adjusted odds ratio (aOR) 2.28 [95% CI: 2.12, 2.46] for smoking only and 2.52 [95% CI:

Aboriginal births: smoking, alcohol misuse, drug misuse, and assault

177 2.00, 3.19] for drug misuse only). However, if the mother both smoked and misused drugs, the  
178 infant's odds of being SGA were not much greater (aOR 2.82 [95% CI: 2.44, 3.25]). Similarly, for  
179 preterm birth, there was an interaction between drug misuse and vaginitis.

180

181 37% of SGA births, 16% of preterm births and 20% of perinatal deaths could be attributed to  
182 smoking, alcohol misuse, drug misuse or assault. As PAFs are affected by prevalence of the risk  
183 factor, as well as the magnitude of the risk, smoking had the highest PAF for each outcome (Figure  
184 2).

185

186 << Figure 2 goes around here >>

187

188 Results from analyses of complete cases were similar to the main results using imputed maternal  
189 heights, with the exception of perinatal death, where the odds were only 29% higher for alcohol  
190 misuse than no misuse among the complete cases, compared to 83% higher among the full sample  
191 [Tables 6-8 in Additional file 1]. The addition of remoteness and socioeconomic disadvantage to the  
192 models slightly attenuated the significant relationships between the poor birth outcomes and  
193 alcohol misuse and assault. However, the odds ratios for smoking changed little and those for drug  
194 misuse increased. The PAFs changed little with the inclusion of remoteness and socioeconomic  
195 disadvantage [Table 9 in Additional file 1].

196

## 197 **Discussion**

198 Between 1998 and 2010, 27% of all Aboriginal infants in WA were SGA, preterm, or died perinatally.

199 A substantial proportion of these outcomes could be attributed to *in utero* exposure to maternal

200 smoking, alcohol misuse, drug misuse, and assault against their mother – 37% of SGA births, 16% of

201 preterm births, and 20% of perinatal deaths. With half (51%) of the infants exposed to at least one of

Aboriginal births: smoking, alcohol misuse, drug misuse, and assault

202 these risk factors, reductions in these interrelated behaviours may greatly improve Aboriginal  
203 perinatal health.

204

205 More poor outcomes could be attributed to smoking than the other risks, reflecting the fact that  
206 47% of infants were exposed. We found 28% of SGA births could be attributed to smoking. By  
207 contrast, Taylor *et al* found that for infants born to mothers in the state of New South Wales (NSW,  
208 97% non-Aboriginal mothers) with a smoking rate of 11% during pregnancy, only 10% of SGA births  
209 for term infants with non-diabetic mothers were attributable to smoking, 3% for term infants with  
210 diabetic mothers, and 12% of SGA births for preterm infants [28].

211

212 It is likely we underestimated the prevalence of alcohol and drug misuse and assault as this  
213 information was not mandatory in the datasets. It is also likely that we identified the more serious  
214 cases, given we identified most cases through hospital admissions and the nature of ICD diagnoses.  
215 Our estimates may also be lower than other studies as we included Aboriginal infants with non-  
216 Aboriginal mothers (18% of births). For example, only 0.5% of infants to non-Aboriginal mothers  
217 were categorised as exposed to alcohol, compared to 3.3% of infants with Aboriginal mothers.

218

219 The true proportion of infants subject to harmful levels of alcohol *in utero* is difficult to assess. It is  
220 not clear which drinking patterns (timing, frequency, and amount) are harmful and few studies have  
221 collected detailed information from Aboriginal women. In WA studies, 23% or more Aboriginal  
222 women drank during pregnancy, though this included any alcohol consumption [29], harmful  
223 consumption from age 10 to a year after pregnancy [30], or the sample was highly selected,  
224 including a community with high average consumption [31, 32].

225

226 Our finding that 6% of infants were exposed to drug misuse may be more accurate than our finding  
227 about alcohol misuse. WA Aboriginal mothers have reported using marijuana during pregnancy for

Aboriginal births: smoking, alcohol misuse, drug misuse, and assault

228 9% of births and other drugs for fewer than 1% [29], though some studies from other states have  
229 found greater drug use [11, 33].

230

231 The proportion of infants whose mothers were categorised as victims of assault (7%) was half the  
232 proportion of all Aboriginal women reported by the Australian Bureau of Statistics to have  
233 experienced physical violence in the past year in 2014-15 (14%) [34]. Nevertheless, the higher odds  
234 of SGA and preterm birth following assault, compared to no assault, (aOR: 1.61 and 1.40,  
235 respectively) were similar to those from a 2010 meta-analysis for low birth weight (aOR: 1.53 [95%  
236 CI: 1.28, 1.82]) and preterm birth (1.46 [95% CI: 1.27, 1.67]) [4]. Hypotheses about the effect of  
237 maternal stress hormones during pregnancy have been proposed, for example, the release of  
238 oxytocin could induce early contractions [35].

239

240 Although we underestimated the prevalence of some risk factors, as they are often clustered in  
241 women the PAF for all risks combined may be a reasonable estimate of the true PAF. For example, if  
242 a woman smoked and misused alcohol, but only smoking was documented, her contribution to the  
243 risk estimate for smoking may encompass the effects of both smoking and alcohol, resulting in a  
244 higher risk estimate for smoking. When the PAF was calculated for all risk factors combined, some of  
245 this additional risk from (unidentified) alcohol misuse would be captured in the combined PAF.

246

247 Approximately 1% of pregnant Aboriginal women in WA have no antenatal care and 17% have no  
248 care until after 24 weeks' gestation [2]. Antenatal care attendance could not be explored in our  
249 analysis as this information was not available for the birth years covered by this study. Substance  
250 misuse and assault and suboptimal antenatal care are clearly associated. However, it is not clear  
251 whether substance misuse and assault affect attendance for antenatal care or whether they share  
252 common causes. If the former, antenatal care is an intermediate variable and including antenatal

Aboriginal births: smoking, alcohol misuse, drug misuse, and assault

253 care in the model might have biased the results. If the latter, and if the common causes are not  
254 adjusted for, our estimates of the effects of the risk factors may be biased upwards.

255

256 Births following terminations of pregnancy from 20 weeks' gestation or with congenital  
257 abnormalities were not excluded because we were interested in population-level outcomes,  
258 substance misuse is associated with certain developmental abnormalities [36], and some of the poor  
259 birth outcomes in this study may have followed the combination of developmental abnormalities  
260 and the risk factors of interest. The proportion of preventable poor birth outcomes would have been  
261 higher in a sample of births which did not include terminations of pregnancy or congenital  
262 abnormalities than in the full population, most likely resulting in higher estimates of the PAFs.

263

264 For this study we used a composite endpoint of stillbirths and neonatal deaths, as estimates  
265 obtained from modelling the 141 neonatal deaths separately would have a high degree of  
266 uncertainty, 'live-birth bias' may bias our estimates, and because the causes of the majority of  
267 neonatal deaths arise prenatally or in the intrapartum period [37, 38].

268

269 Smoking, alcohol and drug misuse, and violence are intrinsically linked and may be triggered by  
270 boredom, unemployment, marginalisation, poor mental health, overcrowded housing, and other  
271 stresses more commonly experienced by Aboriginal people [39-41]. Many Aboriginal people have  
272 complex health and social needs and some mainstream initiatives have been less effective in  
273 Aboriginal populations. For example, while smoking among pregnant Aboriginal women has dropped  
274 considerably, the decrease in recent years has been greater for non-Aboriginal women and non-  
275 Aboriginal women are more likely to quit smoking during pregnancy [6].

276

277 Aboriginal women can face significant barriers to change. Smoking and violence are normalised in  
278 some communities [39, 42] and drinking is frequently social with 27% of 180 Nyoongar women

Aboriginal births: smoking, alcohol misuse, drug misuse, and assault

279 reporting drinking with a male partner while pregnant (Robyn Williams, personal communication, 7  
280 November 2017). Fear of losing children to child protection agencies can discourage women from  
281 seeking help with substance misuse and violence [40]. WA Aboriginal children are 17.5 times more  
282 likely to be in out-of-home care than non-Aboriginal children [43]. Numerous additional challenges  
283 may affect Aboriginal women, such as limited services [40, 41].

284

285 Despite the widespread acknowledgement that Aboriginal-specific risk reduction measures are  
286 needed, rigorous evaluations of Aboriginal-specific responses are rare [44-46]. To the best of our  
287 knowledge only one randomised clinical trial involving pregnant Aboriginal women has been  
288 conducted. This trial aimed to assess the effect of a smoking cessation intervention which included  
289 advice about quitting smoking at a woman's first antenatal appointment, follow-up appointments  
290 with Aboriginal healthcare workers and midwives, and nicotine replacement therapy [47]. More  
291 women in the treatment (psychosocial) arm quit smoking than in the standard care arm, but the  
292 difference was not statistically significant. The trial faced difficulties with high staff turnover,  
293 possible contamination between the two arms, and over 30% loss to follow-up with only 176  
294 completing. Methodologically rigorous studies can be more difficult in Indigenous populations, with  
295 challenges such as small sample sizes and funding time-limits may be insufficient to establish and  
296 maintain relationships with communities [48]. Funding incentives and alternative governance  
297 approaches may encourage more studies [48].

298

299 Evaluations of restrictions (including bans) on the supply of alcohol to communities have found that,  
300 with Aboriginal leadership and community support, they can be effective in reducing consumption  
301 and related harms like violence, despite some unintended consequences [49]. The 2018 decision to  
302 introduce a minimum price for a unit of alcohol across the NT may provide evidence of the impact of  
303 price signals [50].

304

Aboriginal births: smoking, alcohol misuse, drug misuse, and assault

305 The lack of evidence about how to prevent violence against Aboriginal women is unsurprising as,  
306 globally, little is known about what works [51]. Some Aboriginal communities have night patrols.  
307 Evidence of efficacy is limited but many patrols are valued by community members, local police, and  
308 service providers, suggesting they have a positive impact [40].

309

310 Relevant and accessible data are essential to improve the evidence base and calls have recently been  
311 made for increased data collection and linkage; for example, the establishment of a national data  
312 collection on violence and the expansion of perinatal data collections to include details of domestic  
313 violence and substance use [52, 53]. In WA, from 2017, the quantity and frequency of alcohol  
314 consumption during pregnancy will be available. Routinely-collected data can be a cost-effective way  
315 of evaluating programs. Outcomes can be passively measured at many time points, loss to follow up  
316 due to relocation within the state is minimized, and data collection may be more objective. With  
317 population-based data, robust estimates of the scale of these issues can be obtained, as in this  
318 study.

319

320 While the evidence-base for Aboriginal-specific risk reduction measures is limited, studies in other  
321 populations have identified effective approaches that could be tailored to Aboriginal communities.

322

323 An empirical evidence base is only one possible influence on health policy [46]. Evidence from other  
324 populations, studies of the acceptability and feasibility of interventions in an Aboriginal context, and  
325 the knowledge of community members and other stakeholders can inform risk reduction policies.

326 There is widespread agreement that programs must be genuine partnerships or Aboriginal-led,  
327 tailored to local communities, holistic, targeted at the family and community level, as well as  
328 individual, and adequately supported [42, 54, 55]. A supportive, rather than punitive, approach  
329 towards Aboriginal women struggling with substance misuse and violence is needed.

330

Aboriginal births: smoking, alcohol misuse, drug misuse, and assault

331 Underlying smoking, alcohol and drug use, and violence in Aboriginal communities is a post-colonial  
332 history of dispossession, intergenerational trauma, structural racism, and poverty [41, 56].  
333 Addressing the social determinants of these risk factors and poor mental health is an essential part  
334 of reducing these risks.

335

### 336 **Conclusions**

337 With half of WA's Aboriginal infants exposed *in utero* to the preventable risk factors of smoking,  
338 alcohol or drug misuse, or assault against the mother and a large proportion of poor birth outcomes  
339 attributable to this exposure, great improvements in the health of Aboriginal babies are possible  
340 with reductions in these risk factors. These results highlight the importance of identifying and  
341 implementing risk reduction measures which are effective in, and supported by, Aboriginal women,  
342 families and communities.

343

344

345

346

### 347 **Declarations**

348 *Ethics approval and consent to participate*

349 This study was approved by the Western Australian Aboriginal Health Ethics Committee (Ref 306 -  
350 08/10) and the Western Australian Department of Health Ethics Committee (Ref 2010/42). Consent  
351 to participate was not required for this study.

352

353 *Consent for publication*

354 Not applicable.

355

356 *Availability of data and material*



Aboriginal births: smoking, alcohol misuse, drug misuse, and assault

357 The authors do not have permission from the data custodians to make available the data analysed in  
358 this study.

359

#### 360 *Competing interests*

361 The authors declare that they have no competing interests.

362

#### 363 *Funding*

364 This work was supported by the National Health and Medical Research Council (NHMRC) [grant  
365 number 1007878] as part of the Western Australian Aboriginal Intergenerational Fetal Growth Study  
366 (WAAIFS); and Bellberry Limited [postgraduate scholarship in Indigenous health and biostatistics to  
367 AG].

368

#### 369 *Authors' contributions*

370 AG, JS, FS, and SE developed the research question. AG undertook the data analysis and wrote the  
371 first draft. JS, JJ, RW, and SE all supported the data analysis and commented on the drafts. SE  
372 obtained the funding and the data.

373

#### 374 *Acknowledgements*

375 We thank staff at the Western Australian Data Linkage Branch and the data custodians of the  
376 Midwives Notification System, Death Registrations, Hospital Morbidity Data Collection and Mental  
377 Health Information System for access to, and linkage of, the data. We would also like to thank staff  
378 at the Telethon Kids Institute for their involvement in the design of WAAIFS.

379

380 Additional file 1

Aboriginal births: smoking, alcohol misuse, drug misuse, and assault

## References

1. Farrant BM, Shepherd CC. Maternal ethnicity, stillbirth and neonatal death risk in Western Australia 1998-2010. *Aust N Z J Obstet Gynaecol*. 2016;56:532-536.
2. Hutchinson M, Joyce A. Western Australia's Mothers and Babies, 2013: 31st Annual Report of the Western Australian Midwives' Notification System: Perth (AUST): Department of Health, Western Australia; 2016.
3. Diouf I, Gubhaju L, Chamberlain C, McNamara B, Joshy G, Oats J, et al. Trends in maternal and newborn health characteristics and obstetric interventions among Aboriginal and Torres Strait Islander mothers in Western Australia from 1986 to 2009. *Aust N Z J Obstet Gynaecol*. 2016;56:245-251.
4. Shah PS, Shah J. Maternal exposure to domestic violence and pregnancy and birth outcomes: a systematic review and meta-analyses. *J Womens Health*. 2010;19:2017-2031.
5. Flenady V, Koopmans L, Middleton P, Froen JF, Smith GC, Gibbons K, et al. Major risk factors for stillbirth in high-income countries: a systematic review and meta-analysis. *Lancet*. 2011;377:1331-1340.
6. Australian Institute of Health and Welfare. Birthweight of babies born to Indigenous mothers. Canberra (AUST): AIHW; 2014.
7. Chikritzhs T, Liang W. Does the 2008 NATSISS underestimate the prevalence of high risk Indigenous drinking? In: Hunter B, Biddle N, editors. *Survey Analysis for Indigenous Policy in Australia: Social Science Perspectives*. Canberra (AUST): ANU E Press; 2012; p. 49-64.
8. Australian Bureau of Statistics. National Aboriginal and Torres Strait Islander Social Survey, 2014-15. Cat. No. 4714.0. 2016.  
<http://www.abs.gov.au/ausstats/abs@.nsf/Lookup/by%20Subject/4714.0~2014-15~Main%20Features~Health%20risk%20factors~12>. Accessed 28 Jul 2017.
9. Australian Institute of Health and Welfare. National Drug Strategy Household Survey 2016: detailed findings. Drug Statistics series no. 31. Cat. no. PHE 214. Canberra (AUST): AIHW; 2017.
10. Australian Health Ministers' Advisory Council. Aboriginal and Torres Strait Islander Health Performance Framework Report 2010. Canberra (AUST): AHMAC; 2011.
11. Passey ME, Sanson-Fisher RW, D'Este CA, Stirling JM. Tobacco, alcohol and cannabis use during pregnancy: clustering of risks. *Drug Alcohol Depend*. 2014;134:44-50.
12. Gibberd AJ, Simpson JM, Eades SJ. Use of family relationships improved consistency of identification of Aboriginal people in linked administrative data. *J Clin Epidemiol*. 2017;90:144-155.
13. Glasson EJ, de Klerk NH, Bass AJ, Rosman DL, Palmer LJ, Holman CD. Cohort profile: The Western Australian Family Connections Genealogical Project. *Int J Epidemiol* 2008;37:30e5.
14. Dobbins TA, Sullivan EA, Roberts CL, Simpson JM. Australian national birthweight percentiles by sex and gestational age, 1998-2007. *Med J Aust*. 2012;197:291-294.
15. Australian Institute of Health and Welfare. Perinatal deaths in Australia: 2013-2014. Canberra (AUST): AIHW; 2018
16. Blair E, Liu Y, Cosgrove P. Choosing the best estimate of gestational age from routinely collected population-based perinatal data. *Paediatr Perinat Epidemiol*. 2004;18(4):270-6.
17. Taillieu TL, Brownridge DA. Violence against pregnant women: Prevalence, patterns, risk factors, theories, and directions for future research. *Aggress Violent Behav*. 2010;15:14-35.
18. Silverman JG, Decker MR, Reed E, Raj A. Intimate partner violence victimization prior to and during pregnancy among women residing in 26 US states: associations with maternal and neonatal health. *Am J Obstet Gynecol*. 2006;195:140-148.
19. Harrison PA, Sidebottom AC. Alcohol and drug use before and during pregnancy: an examination of use patterns and predictors of cessation. *Matern Child Health J*. 2009;13:386.

Aboriginal births: smoking, alcohol misuse, drug misuse, and assault

20. Powers JR, McDermott LJ, Loxton DJ, Chojenta CL. A prospective study of prevalence and predictors of concurrent alcohol and tobacco use during pregnancy. *Matern Child Health J.* 2013;17:76-84.
21. Lain SJ, Hadfield RM, Raynes-Greenow CH, Ford JB, Mealing NM, Algert CS, et al. Quality of data in perinatal population health databases: a systematic review. *Med Care.* 2012; 50:e7-20.
22. Royston P, Sauerbrei W. *Multivariable model-building: a pragmatic approach to regression analysis based on fractional polynomials for modelling continuous variables.* West Sussex (UK): John Wiley & Sons; 2008.
23. Han Z, Lutsiv O, Mulla S, McDonald SD. Maternal height and the risk of preterm birth and low birth weight: a systematic review and meta-analyses. *J Obstet Gynaecol Can.* 2012; 34:721-746.
24. van Buuren S. *Flexible imputation of missing data.* Boca Raton (FL): CRC press; 2012.
25. Rubin DB. *Multiple imputation for nonresponse in surveys.* New York (NY): Wiley; 1987.
26. Greenland S, Drescher K. Maximum likelihood estimation of the attributable fraction from logistic models. *Biometrics.* 1993; 49:865-872.
27. R Core Team. *R: A language and environment for statistical computing.* R Foundation for Statistical Computing, Vienna, Austria. 2015 and 2017. Available from: <https://www.R-project.org/>.
28. Taylor LK, Lee YYC, Lim K, Simpson JM, Roberts CL, Morris J. Potential prevention of small for gestational age in Australia: a population-based linkage study. *BMC Pregnancy Childbirth.* 2013;13:210.
29. Zubrick SR, Lawrence DM, Silburn SR, Blair E, Milroy H, Wilkes T, et al. *The Western Australian Aboriginal Child Health Survey: The Health of Aboriginal Children and Young People.* Perth (AUST): Telethon Institute for Child Health Research; 2004.
30. O'Leary CM, Halliday J, Bartu A, D'Antoine H, Bower C. Alcohol-use disorders during and within one year of pregnancy: a population-based cohort study 1985-2006. *BJOG.* 2013;120:744-753.
31. Eades SJ. *Bibbulung Gnarneep (Solid Kid): A Longitudinal Study of a Population Based Cohort of Urban Aboriginal Children in Western Australia: Determinants of Health Outcomes During Early Childhood of Aboriginal Children Residing in an Urban Area.* Perth (AUST): University of Western Australia; 2004.
32. Fitzpatrick JP, Latimer J, Ferreira ML, Carter M, Oscar J, Martiniuk AL, et al. Prevalence and patterns of alcohol use in pregnancy in remote Western Australian communities: The Lililwan Project. *Drug Alcohol Rev.* 2015;34:329-339.
33. Brown SJ, Mensah FK, Ah Kit J, Stuart-Butler D, Glover K, Leane C, et al. Use of cannabis during pregnancy and birth outcomes in an Aboriginal birth cohort: a cross-sectional, population-based study. *BMJ Open.* 2016;6:e010286.
34. Australian Bureau of Statistics. *National Aboriginal and Torres Strait Islander Social Survey, 2014-15.* Cat. No. 4714.0. 2016. <http://www.abs.gov.au/AUSSTATS/abs@.nsf/DetailsPage/4714.02014-15?OpenDocument>. Accessed 14 March 2018.
35. Gaignic-Philippe R, Dayan J, Chokron S, Jacquet AY, Tordjman S. Effects of prenatal stress on fetal and child development: a critical literature review. *Neurosci Biobehav Rev.* 2014;43:137-162.
36. Viteri OA, Soto EE, Bahado-Singh RO, Christensen CW, Chauhan SP, Sibai BM. Fetal anomalies and long-term effects associated with substance abuse in pregnancy: a literature review. *Am J Perinatol.* 2015;32(5):405-16.
37. Liew Z, Olsen J, Cui X, Ritz B, Arah OA. Bias from conditioning on live birth in pregnancy cohorts: an illustration based on neurodevelopment in children after prenatal exposure to organic pollutants. *Int J Epidemiol.* 2015;44(1):345-54.

Aboriginal births: smoking, alcohol misuse, drug misuse, and assault

38. Australian Institute of Health and Welfare. Perinatal deaths in Australia: 2013–2014. Canberra (AUST): AIHW; 2018
39. Wood L, France K, Hunt K, Eades S, Slack-Smith L. Indigenous women and smoking during pregnancy: knowledge, cultural contexts and barriers to cessation. *Soc Sci Med*. 2008;66:2378-2389.
40. Blagg H, Bluett-Boyd N, Williams E. Innovative models in addressing violence against Indigenous women: State of knowledge paper. Sydney (AUST): ANROWS; 2015.
41. Gray D, Cartwright K, Stearne A, Sagggers S, Wilkes E, Wilson M. Review of the harmful use of alcohol among Aboriginal and Torres Strait Islander people. Australian Indigenous HealthInfoNet. 2017.
42. Blagg H, Williams E, Cummings E, Hovane V, Torres M, Woodley KN. Innovative models in addressing violence against Indigenous women: Final report. Sydney (AUST): ANROWS; 2018.
43. SNAICC - National Voice for our Children. The Family Matters Report 2017: Measuring trends to turn the tide on the over-representation of Aboriginal and Torres Strait Islander children in out-of-home care in Australia. 2017.
44. Leske S, Harris MG, Charlson FJ, Ferrari AJ, Baxter AJ, Logan JM, et al. Systematic review of interventions for Indigenous adults with mental and substance use disorders in Australia, Canada, New Zealand and the United States. *Aust N Z J Psychiatry*. 2016;50:1040-1054.
45. Whitty M, Clifford A. The Dissemination of Alcohol Interventions for Indigenous Australians: A Mixed Studies Review Using Narrative Synthesis. *J Alcohol Drug Depend*. 2017;5:2.
46. Vujcich D, Rayner M, Allender S, Fitzpatrick R. When there is not enough evidence and when evidence is not enough: an Australian Indigenous smoking policy study. *Front Public Health*. 2016;4:228.
47. Eades SJ, Sanson-Fisher RW, Wenitong M, Panaretto K, D'Este C, Gilligan C, et al. An intensive smoking intervention for pregnant Aboriginal and Torres Strait Islander women: a randomised controlled trial. *Med J Aust*. 2012;197:42-46.
48. Paul CL, Sanson-Fisher R, Stewart J, Anderson AE. Being sorry is not enough: the sorry state of the evidence base for improving the health of indigenous populations. *Am J Prev Med*. 2010;38:566-568.
49. Muhunthan J, Angell B, Hackett ML, Wilson A, Latimer J, Eades A-M, et al. Global systematic review of Indigenous community-led legal interventions to control alcohol. *BMJ Open*. 2017; 7.
50. Northern Territory Government. Northern Territory Alcohol Harm Minimisation Plan 2018-2019. Darwin (AUST): Northern Territory Government; 2018
51. Jahanfar S, Howard LM, Medley N. Interventions for preventing or reducing domestic violence against pregnant women. *Cochrane Libr*. 2014.
52. National Congress. Aboriginal and Torres Strait Islander Peak Organisations Unite: The Redfern Statement. 2016. [https://nationalcongress.com.au/wp-content/uploads/2017/02/The-Redfern-Statement-9-June-\\_Final.pdf](https://nationalcongress.com.au/wp-content/uploads/2017/02/The-Redfern-Statement-9-June-_Final.pdf). Accessed 6 Mar 2018.
53. Australian Institute of Health and Welfare. Enhancing maternity data collection and reporting in Australia: National Maternity Data Development Project Stage 2. Cat. no. PER 73. Canberra (AUST): AIHW; 2016.
54. Upton P, Davey R, Evans M, Mikhailovich K, Simpson L, Hacklin D. Tackling Indigenous Smoking and Healthy Lifestyle Programme Review: A Multi-criteria Decision Analysis. Canberra (AUST): University of Canberra; 2014.
55. Intergovernmental Committee on Drugs. National Aboriginal and Torres Strait Islander peoples' drug strategy 2014-2019: A sub-strategy of the National Drug Strategy 2010 - 2015. Canberra (AUST): Australian Government; 2015.
56. Ranzijn R, Nolan W. Psychology and Indigenous Australians: Foundations of cultural competence. Melbourne (AUST): Palgrave Macmillan Australia; 2009.

Aboriginal births: smoking, alcohol misuse, drug misuse, and assault

Aboriginal births: smoking, alcohol misuse, drug misuse, and assault

**Table 1: Associations between birth outcomes and infant and maternal characteristics for 28,119 WA Aboriginal singletons born 1998-2010**

| Characteristic                     |           | Overall    | Small for gestational age |            | Preterm birth |            | Perinatal death |            |
|------------------------------------|-----------|------------|---------------------------|------------|---------------|------------|-----------------|------------|
|                                    |           |            | Yes                       | No         | Yes           | No         | Yes             | No         |
| <i>Risk factors of interest</i>    |           |            |                           |            |               |            |                 |            |
| Maternal smoking                   | Yes       | 13292 (47) | 2821 (21)                 | 10435 (79) | 1974 (15)     | 11318 (85) | 267 (2)         | 13025 (98) |
|                                    | No        | 14827 (53) | 1584 (11)                 | 13212 (89) | 1679 (11)     | 13148 (89) | 197 (1)         | 14630 (99) |
| Alcohol misuse                     | Yes       | 799 (3)    | 286 (36)                  | 509 (64)   | 187 (23)      | 612 (77)   | 27 (3)          | 772 (97)   |
|                                    | No        | 27320 (97) | 4119 (15)                 | 23138 (85) | 3466 (13)     | 23854 (87) | 437 (2)         | 26883 (98) |
| Drug misuse                        | Yes       | 1824 (6)   | 488 (27)                  | 1334 (73)  | 454 (25)      | 1370 (75)  | 38 (2)          | 1786 (98)  |
|                                    | No        | 26295 (94) | 3917 (15)                 | 22313 (85) | 3199 (12)     | 23096 (88) | 426 (2)         | 25869 (98) |
| Assault against mother             | Yes       | 2015 (7)   | 523 (26)                  | 1482 (74)  | 395 (20)      | 1620 (80)  | 37 (2)          | 1978 (98)  |
|                                    | No        | 26104 (93) | 3882 (15)                 | 22165 (85) | 3258 (12)     | 22846 (88) | 427 (2)         | 25677 (98) |
| <i>Demographic factors</i>         |           |            |                           |            |               |            |                 |            |
| Infant's sex                       | Male      | 14161 (50) | 2304 (16)                 | 11824 (84) | 1865 (13)     | 12296 (87) | 241 (2)         | 13920 (98) |
|                                    | Female    | 13958 (50) | 2101 (15)                 | 11823 (85) | 1788 (13)     | 12170 (87) | 223 (2)         | 13735 (98) |
| Maternal age (years)               | 12-15     | 556 (2)    | 93 (17)                   | 457 (83)   | 89 (16)       | 467 (84)   | 16 (3)          | 540 (97)   |
|                                    | 16-19     | 5717 (20)  | 1077 (19)                 | 4621 (81)  | 750 (13)      | 4967 (87)  | 91 (2)          | 5626 (98)  |
|                                    | 20-24     | 9008 (32)  | 1403 (16)                 | 7584 (84)  | 1144 (13)     | 7864 (87)  | 138 (2)         | 8870 (98)  |
|                                    | 25-29     | 6816 (24)  | 973 (14)                  | 5832 (86)  | 827 (12)      | 5989 (88)  | 111 (2)         | 6705 (98)  |
|                                    | 30-34     | 3994 (14)  | 574 (14)                  | 3412 (86)  | 532 (13)      | 3462 (87)  | 62 (2)          | 3932 (98)  |
|                                    | 35-50     | 2028 (7)   | 285 (14)                  | 1741 (86)  | 311 (15)      | 1717 (85)  | 46 (2)          | 1982 (98)  |
| Parity                             | 0         | 8636 (31)  | 1634 (19)                 | 6979 (81)  | 1034 (12)     | 7602 (88)  | 138 (2)         | 8498 (98)  |
|                                    | 1         | 6898 (25)  | 973 (14)                  | 5911 (86)  | 858 (12)      | 6040 (88)  | 100 (1)         | 6798 (99)  |
|                                    | 2 or more | 12585 (45) | 1798 (14)                 | 10757 (86) | 1761 (14)     | 10824 (86) | 226 (2)         | 12359 (98) |
| <i>Infections during pregnancy</i> |           |            |                           |            |               |            |                 |            |
| Vaginitis                          | Yes       | 1747 (6)   | 305 (17)                  | 1439 (83)  | 464 (27)      | 1283 (73)  | 43 (2)          | 1704 (98)  |
|                                    | No        | 26372 (94) | 4100 (16)                 | 22208 (84) | 3189 (12)     | 23183 (88) | 421 (2)         | 25951 (98) |
| Urinary tract infection            | Yes       | 3997 (14)  | 720 (18)                  | 3269 (82)  | 639 (16)      | 3358 (84)  | 89 (2)          | 3908 (98)  |
|                                    | No        | 24122 (86) | 3685 (15)                 | 20378 (85) | 3014 (12)     | 21108 (88) | 375 (2)         | 23747 (98) |
| Herpes simplex                     | Yes       | 320 (1)    | 33 (10)                   | 286 (90)   | 42 (13)       | 278 (87)   | 6 (2)           | 314 (98)   |
|                                    | No        | 27799 (99) | 4372 (16)                 | 23361 (84) | 3611 (13)     | 24188 (87) | 458 (2)         | 27341 (98) |
| Gonorrhoea                         | Yes       | 192 (1)    | 56 (30)                   | 133 (70)   | 44 (23)       | 148 (77)   | n.p.            | n.p.       |
|                                    | No        | 27927 (99) | 4349 (16)                 | 23514 (84) | 3609 (13)     | 24318 (87) | n.p.            | n.p.       |
| Chlamydia                          | Yes       | 255 (1)    | 47 (21)                   | 177 (79)   | 44 (20)       | 181 (80)   | 5 (2)           | 220 (98)   |
|                                    | No        | 27894 (99) | 4358 (16)                 | 23470 (84) | 3609 (13)     | 24285 (87) | 459 (2)         | 27435 (98) |
| Group B streptococcus              | Yes       | 1333 (5)   | 208 (16)                  | 1124 (84)  | 256 (19)      | 1077 (81)  | 22 (2)          | 1311 (98)  |
|                                    | No        | 26786 (95) | 4197 (16)                 | 22523 (84) | 3397 (13)     | 23389 (87) | 442 (2)         | 26344 (98) |
| Other infections                   | Yes       | 148 (1)    | 40 (27)                   | 107 (73)   | 26 (18)       | 122 (82)   | 6 (4)           | 142 (96)   |
|                                    | No        | 27971 (99) | 4365 (16)                 | 23540 (84) | 3627 (13)     | 24344 (87) | 458 (2)         | 27513 (98) |
| <i>Other maternal conditions</i>   |           |            |                           |            |               |            |                 |            |
| Diabetes                           | Yes       | 1841 (7)   | 151 (8)                   | 1688 (92)  | 373 (20)      | 1468 (80)  | 46 (2)          | 1795 (98)  |
|                                    | No        | 26278 (93) | 4254 (16)                 | 21959 (84) | 3280 (12)     | 22998 (88) | 418 (2)         | 25860 (98) |

Aboriginal births: smoking, alcohol misuse, drug misuse, and assault

|               |     |             |           |            |           |            |         |            |
|---------------|-----|-------------|-----------|------------|-----------|------------|---------|------------|
| Hypertension  | Yes | 2811 (10)   | 503 (18)  | 2303 (82)  | 579 (21)  | 2232 (79)  | 45 (2)  | 2766 (98)  |
|               | No  | 25308 (90)  | 3902 (15) | 21344 (85) | 3074 (12) | 22234 (88) | 419 (2) | 24889 (98) |
| Obesity       | Yes | 600 (2)     | 39 (7)    | 559 (93)   | 116 (19)  | 484 (81)   | 13 (2)  | 587 (98)   |
|               | No  | 27519 (98)  | 4366 (16) | 23088 (84) | 3537 (13) | 23982 (87) | 451 (2) | 27068 (98) |
| Mental health | Yes | 2017 (7)    | 328 (16)  | 1686 (84)  | 357 (18)  | 1660 (82)  | 47 (2)  | 1970 (98)  |
|               | No  | 26102 (93)  | 4077 (16) | 21961 (84) | 3296 (13) | 22806 (87) | 417 (2) | 25685 (98) |
| Heart disease | Yes | 225 (1)     | 35 (16)   | 190 (84)   | 48 (21)   | 177 (79)   | 5 (2)   | 220 (98)   |
|               | No  | 27894 (99)  | 4370 (16) | 23457 (84) | 3605 (13) | 24289 (87) | 459 (2) | 27435 (98) |
| Asthma        | Yes | 3136 (11)   | 477 (15)  | 2657 (85)  | 424 (14)  | 2712 (86)  | 42 (1)  | 3094 (99)  |
|               | No  | 24983 (89)  | 3928 (16) | 20990 (84) | 3229 (13) | 21754 (87) | 422 (2) | 24561 (98) |
| Total         |     | 28119 (100) | 4405 (16) | 23647 (84) | 3653 (13) | 24466 (87) | 464 (2) | 27655 (98) |

n.p.=counts not publishable because of privacy concerns as they are less than 5 or could lead to calculation of a count of less than 5. Hypertension refers to pre-existing hypertension complicating pregnancy, pre-eclampsia, and eclampsia. Vaginitis also includes candida and trichomoniasis. Other infections refers to syphilis, toxoplasmosis, rubella, cytomegalovirus, and varicella zoster. <sup>a</sup> 67 cases of unknown gestational age were excluded.

Aboriginal births: smoking, alcohol misuse, drug misuse, and assault

**Figure 1: Adjusted odds ratios (aOR) of birth outcomes from smoking, alcohol misuse, drug misuse, and assault**

Adjusted odds ratios are for 28,119 Aboriginal singleton infants born in Western Australia, 1998-2010. Bars are 95% confidence intervals. Each model adjusted for maternal smoking, drug misuse, alcohol misuse, assault, maternal height and diabetes. The model for SGA also included an interaction between maternal smoking and drug misuse, infant sex, parity, hypertension (pre-existing hypertension complicating pregnancy, pre-eclampsia, and eclampsia), obesity, gonorrhoea, herpes, and other infections (syphilis, toxoplasmosis, rubella, cytomegalovirus, and varicella zoster). The model for preterm birth also included an interaction between drug misuse and vaginitis (vaginitis, candida and trichomoniasis), maternal age, parity, infant's year of birth, hypertension, heart disease, urinary tract infection, Group B streptococcus, obesity, mental health conditions, and gonorrhoea. The model for perinatal death also included maternal age and urinary tract infection. Confidence intervals are dashed for risks with interactions and solid otherwise.



Aboriginal births: smoking, alcohol misuse, drug misuse, and assault

**Figure 2: Adjusted population attributable fractions for birth outcomes from smoking, alcohol misuse, drug misuse, and assault**

Adjusted population attributable fractions with 95% confidence intervals are for 28,119 Aboriginal singleton infants born in Western Australia, 1998-2010. Each model adjusted for maternal smoking, drug misuse, alcohol misuse, assault, maternal height and diabetes. The model for SGA also included an interaction between maternal smoking and drug misuse, infant sex, parity, hypertension (pre-existing hypertension complicating pregnancy, pre-eclampsia, and eclampsia), obesity, gonorrhoea, herpes, and other infections (syphilis, toxoplasmosis, rubella, cytomegalovirus, and varicella zoster). The model for preterm birth also included an interaction between drug misuse and vaginitis (vaginitis, candida and trichomoniasis), maternal age, parity, infant's year of birth, hypertension, heart disease, urinary tract infection, Group B streptococcus, obesity, mental health conditions, and gonorrhoea. The model for perinatal death also included maternal age and urinary tract infection.

| Outcome         | Risk                    |                  | aOR (95% CI)      |
|-----------------|-------------------------|------------------|-------------------|
| SGA             | Smoking x drug misuse   | Neither          | 1.00              |
|                 |                         | Smoking only     | 2.28 (2.12, 2.46) |
|                 |                         | Drug misuse only | 2.52 (2.00, 3.19) |
|                 |                         | Both             | 2.82 (2.44, 3.25) |
|                 | Alcohol misuse          |                  | 2.18 (1.84, 2.58) |
| Preterm         | Drug misuse x vaginitis | Neither          | 1.00              |
|                 |                         | Drug misuse only | 2.16 (1.88, 2.49) |
|                 |                         | Vaginitis only   | 2.36 (2.06, 2.70) |
|                 |                         | Both             | 2.88 (2.17, 3.81) |
|                 | Smoking                 |                  | 1.26 (1.17, 1.36) |
| Perinatal death | Smoking                 |                  | 1.49 (1.23, 1.80) |
|                 | Drug misuse             |                  | 1.06 (0.74, 1.54) |
|                 | Alcohol misuse          |                  | 1.83 (1.16, 2.88) |
|                 | Assault                 |                  | 0.90 (0.61, 1.34) |

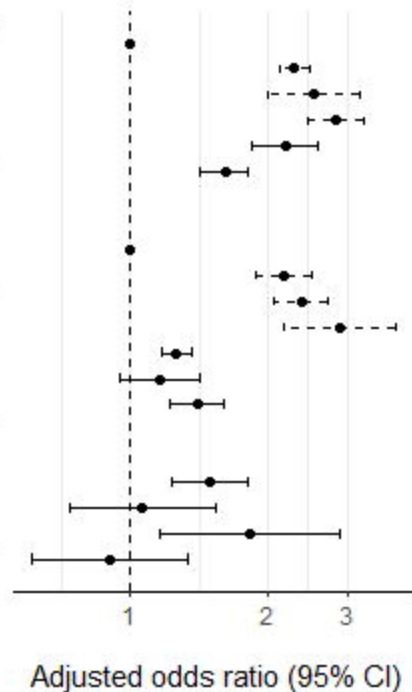

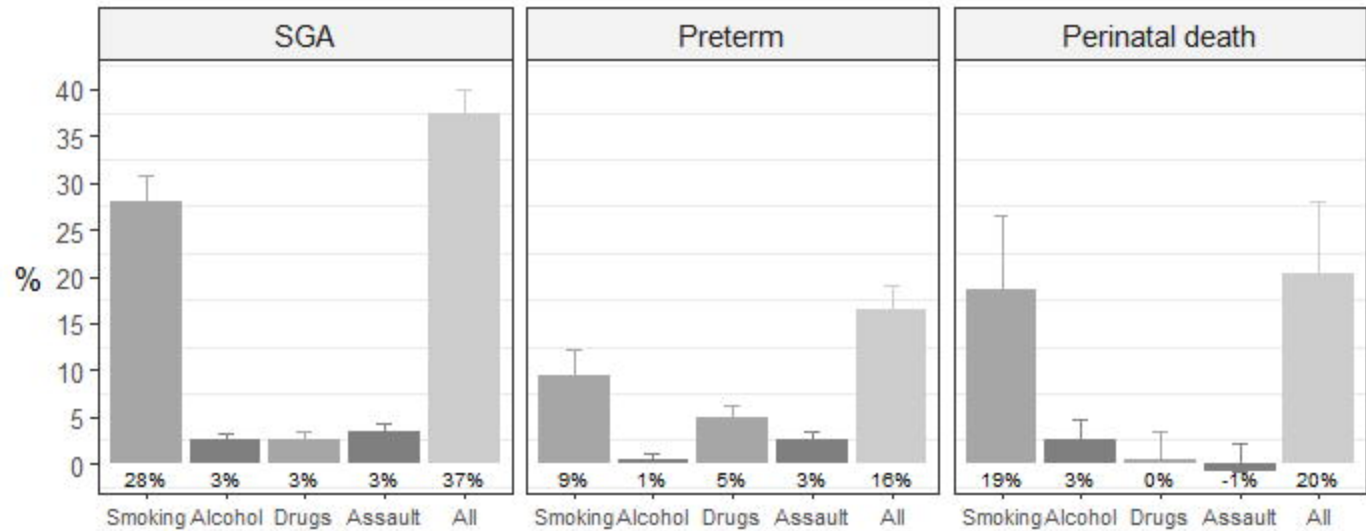

Source: http://biorxiv.org/content/10.1101/553065v1.full.pdf
